# Supplementary material for: Mutations in TIMM50 compromise cell survival in OxPhos‐dependent metabolic conditions
Source: PubMed Central journal article supplement (PMC6180300; doi:10.15252/emmm.201708698), 2018-09-06

1C

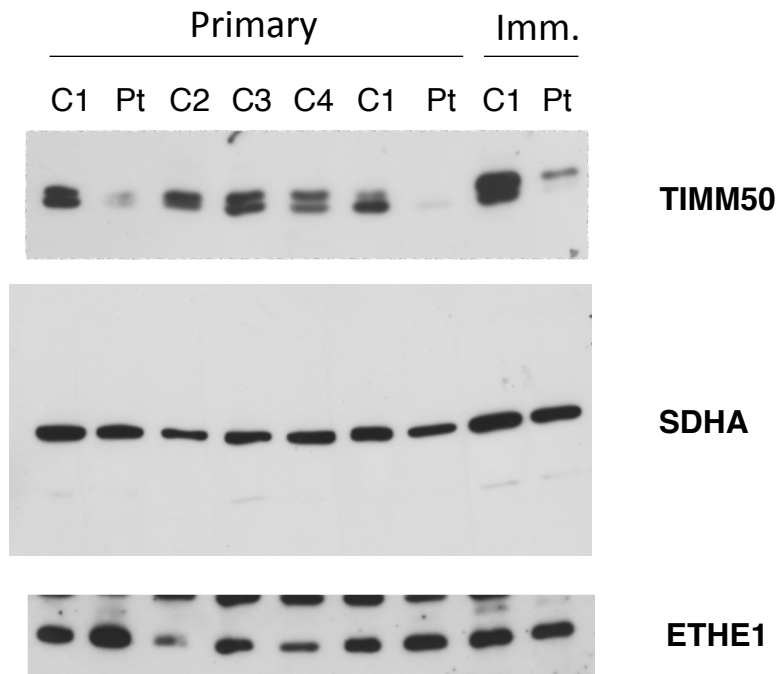

Supplement: EMMM-10-e8698-s003.pdf [file EMMM-10-e8698-s003.pdf]
